# Supplementary material for: Functionalization of silver nanoparticles with 5-sulfoanthranilic acid dithiocarbamate for selective colorimetric detection of Mn2+and Cd2+ions
Source: Royal Society of Chemistry journal article supplement (doi:10.1039/c5nj03454j), 2016-01-01
Supplement: c5nj03454j1.pdf [file c5nj03454j1.pdf]

# Functionalization of silver nanoparticles with 5-sulfoanthranilic acid dithiocarbamate for selective colorimetric detection of $Mn^{2+}$ and $Cd^{2+}$ ions

Vaibhavkumar N. Mehta, Jigneshkumar V. Rohit and Suresh Kumar Kailasa\*

Applied Chemistry Department, S. V. National Institute of Technology, Surat-395 007, India

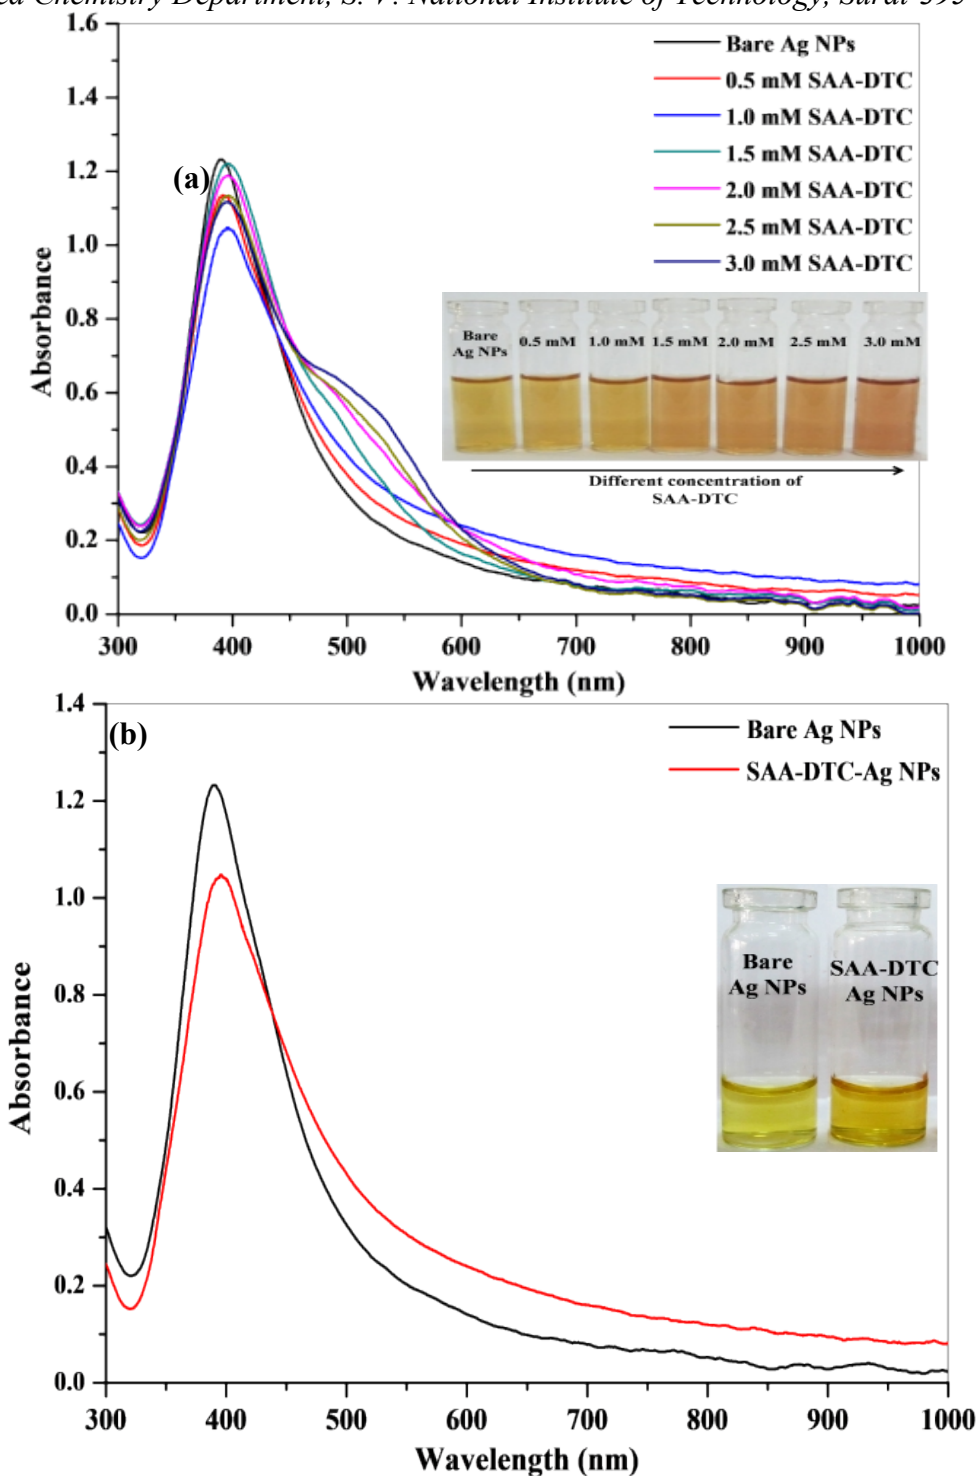

**Figure S1.** (a) UV-visible spectra and photographic images of Ag NPs after functionalization with different concentration of SAA-DTC ligands (0.5 to 3.0 mM). (b) UV-visible spectra and photographic images of bare Ag NPs and SAA-DTC-Ag NPs.

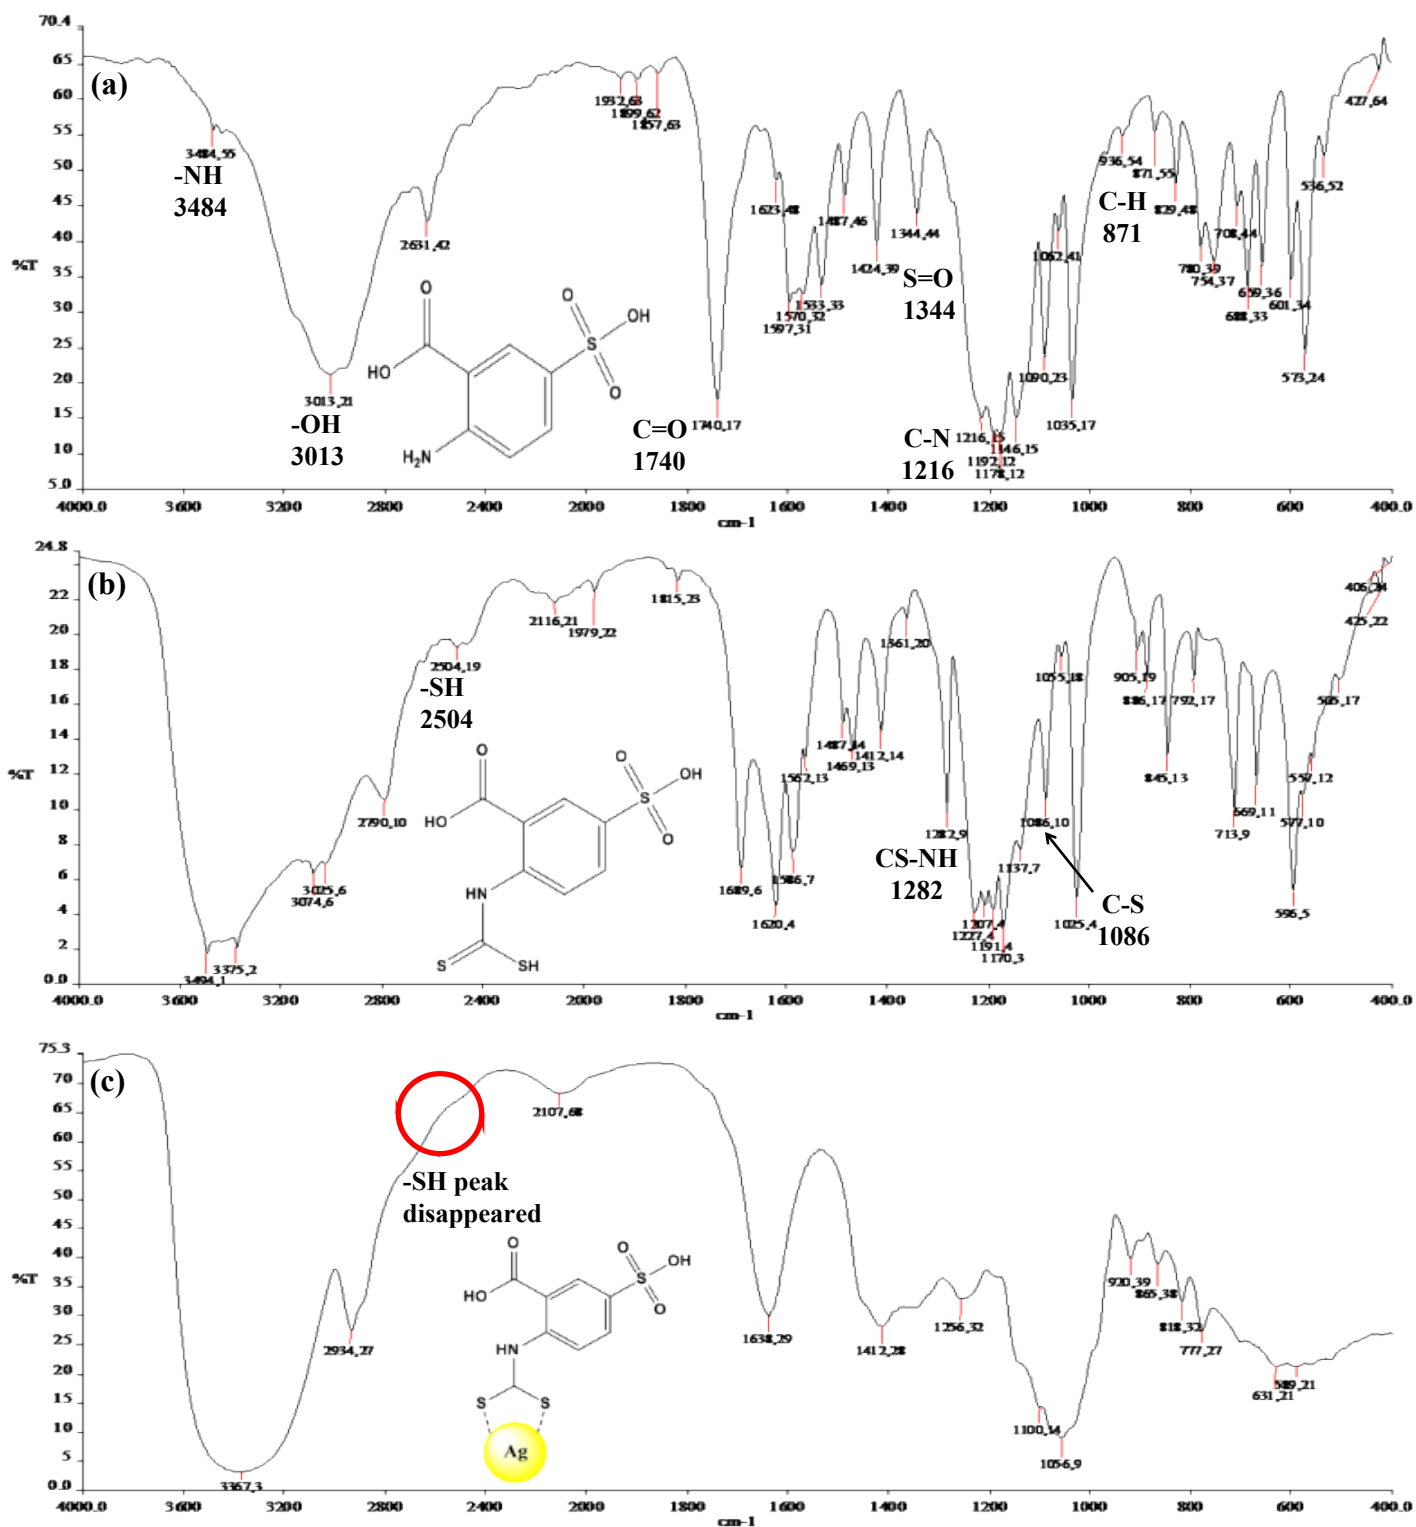

**Figure S2.** FT-IR spectra of (a) 5-sulfoanthranillic acid (b) SAA-DTC and (c) SAA-DTC-Ag NPs.

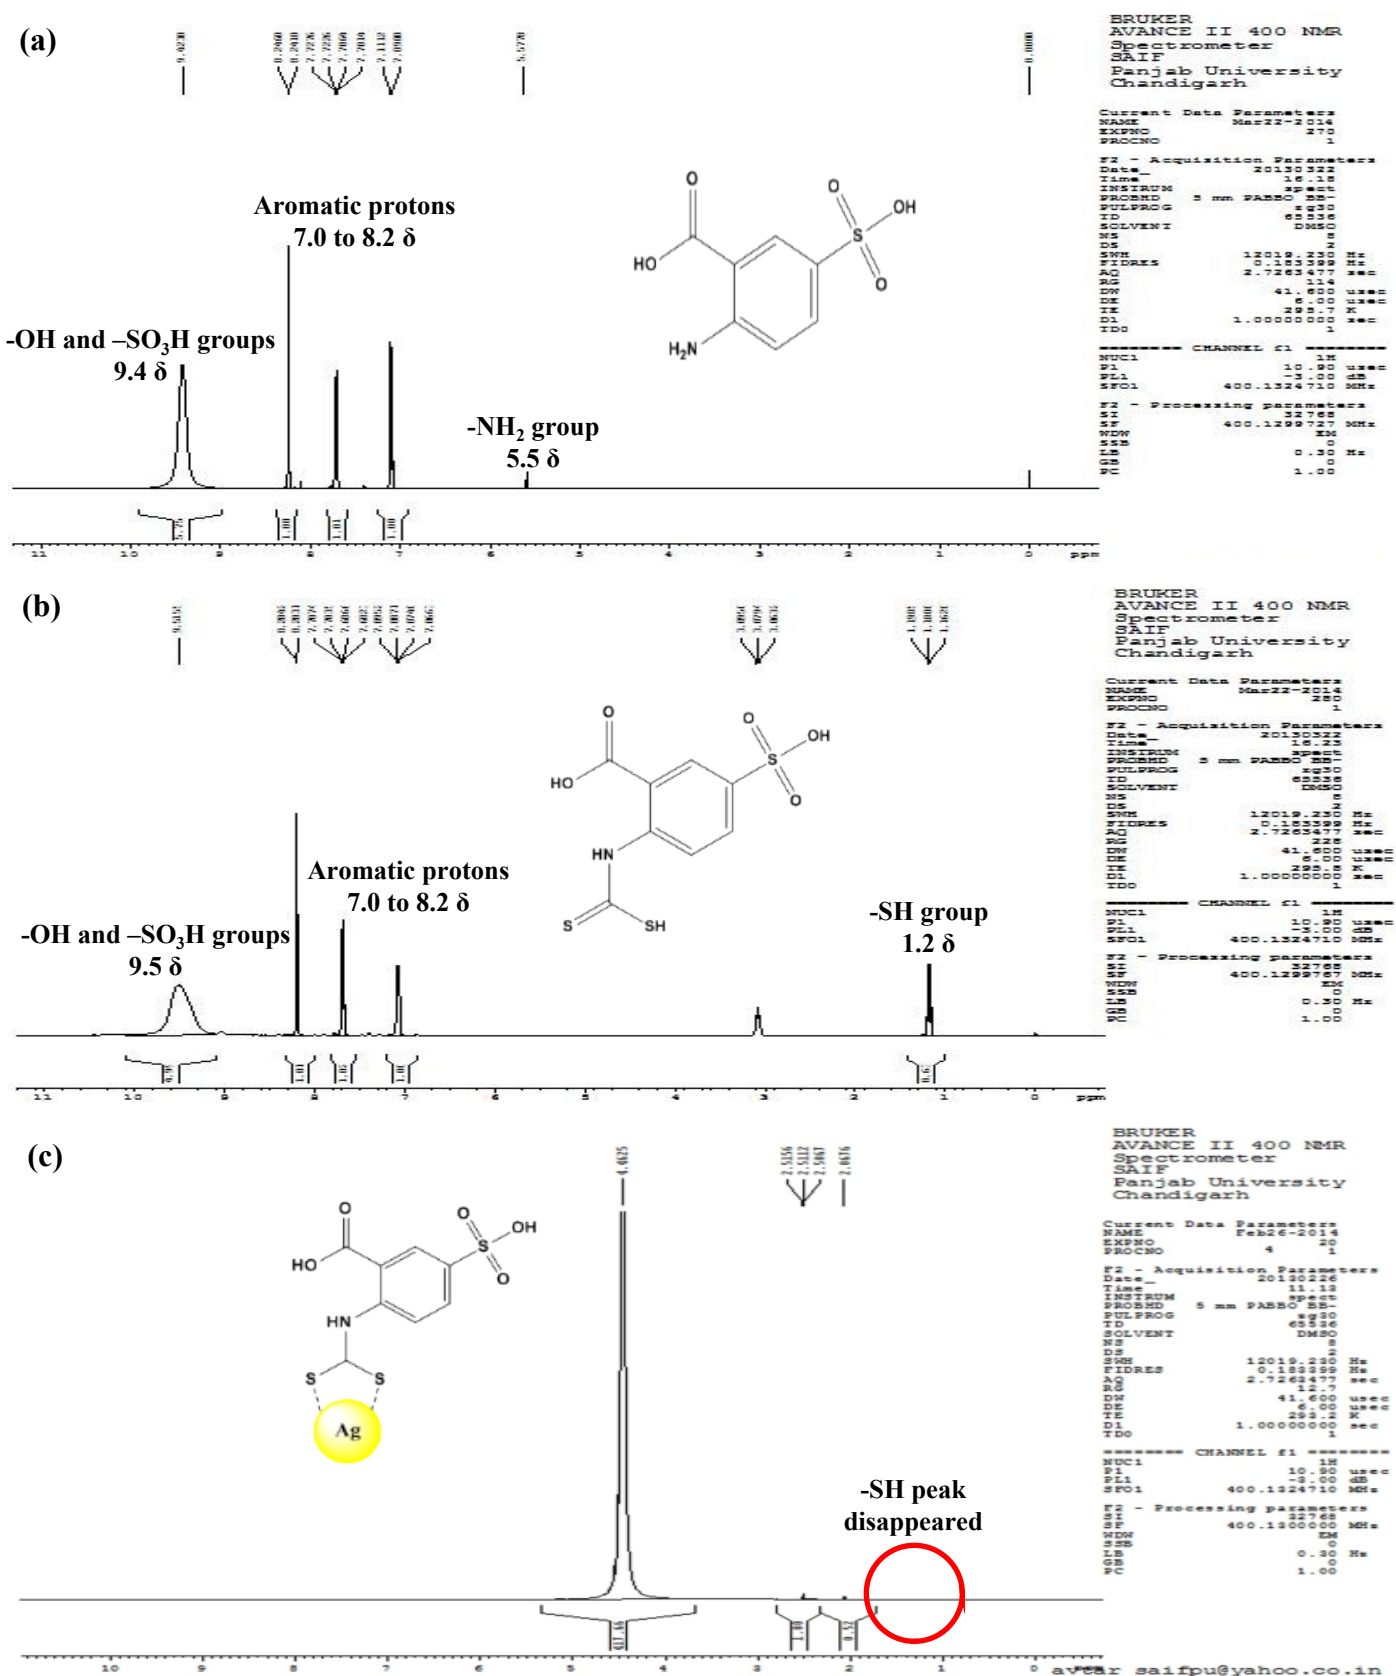

**Figure S3.** <sup>1</sup>H-NMR spectra of (a) 5-sulfoanthranillic acid (b) SAA-DTC and (c) SAA-DTC-Ag NPs.

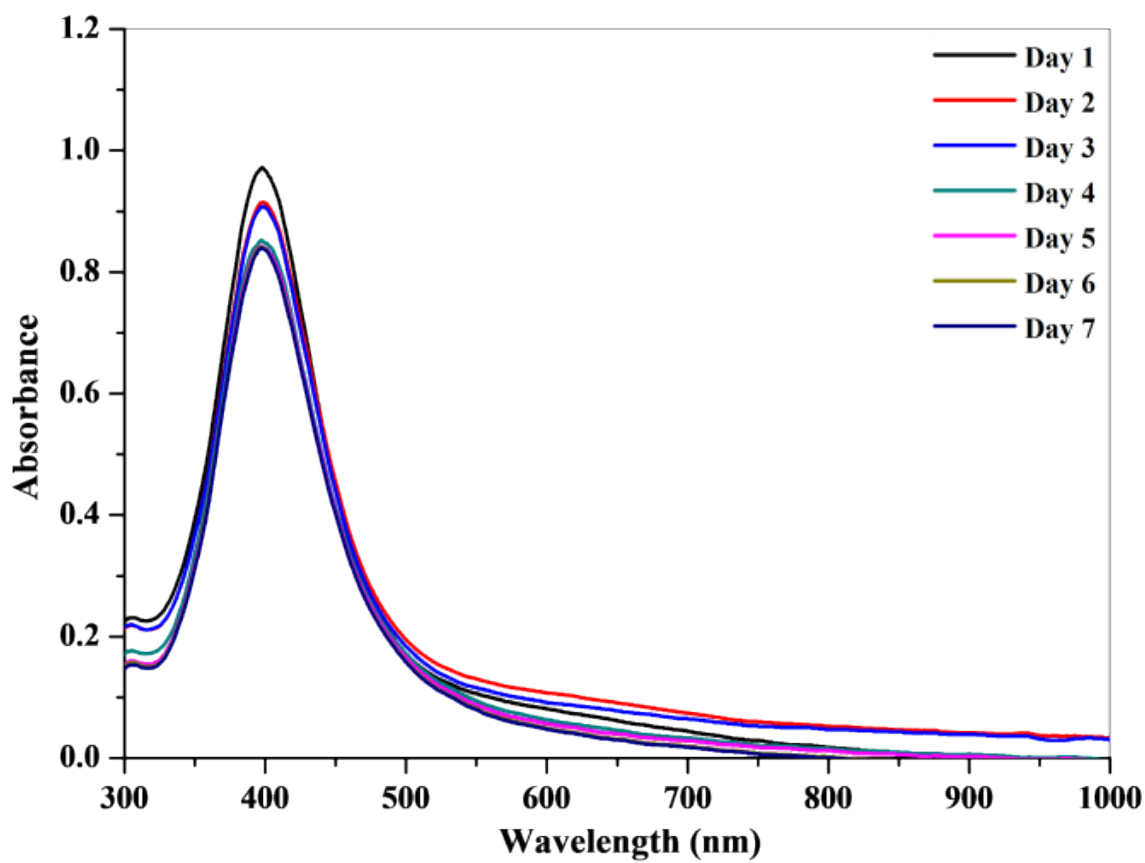

**Figure S4.** UV-visible absorption spectra of SAA-DTC-Ag NPs at different days from 1 to 7 day.

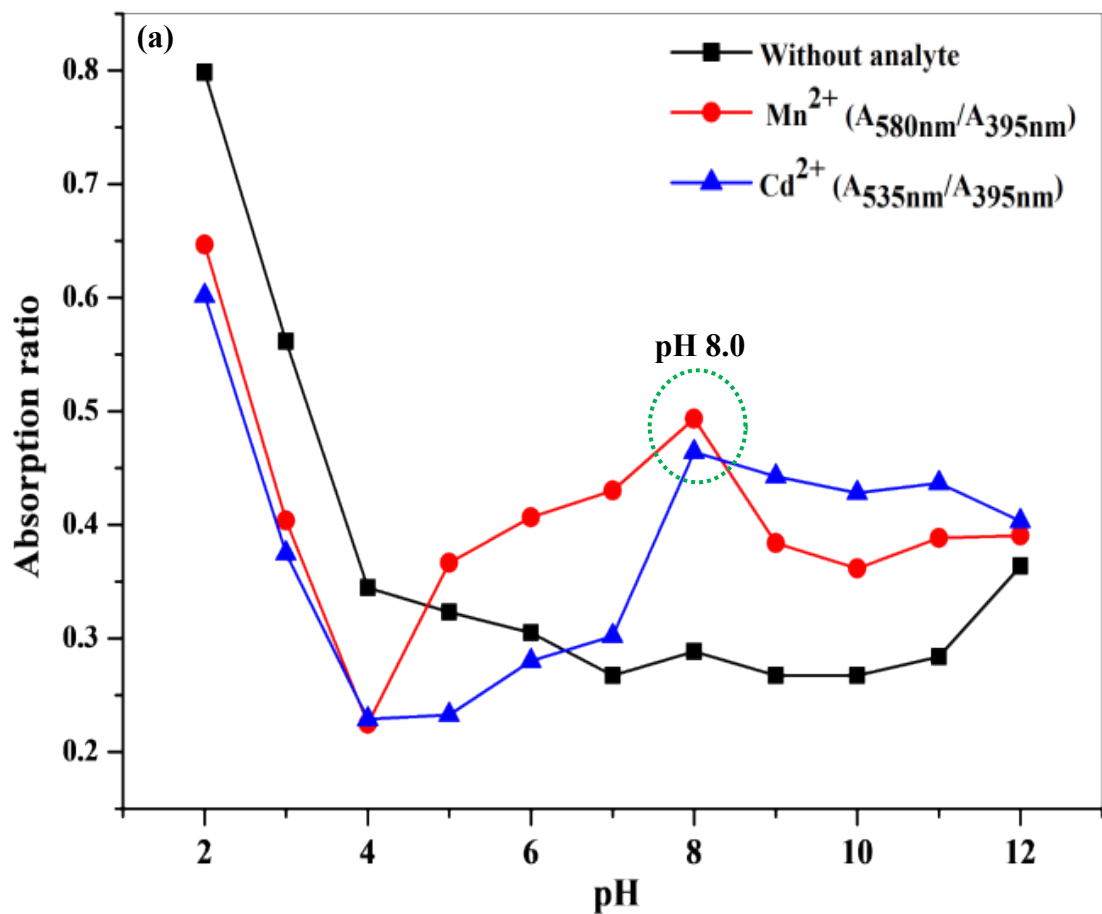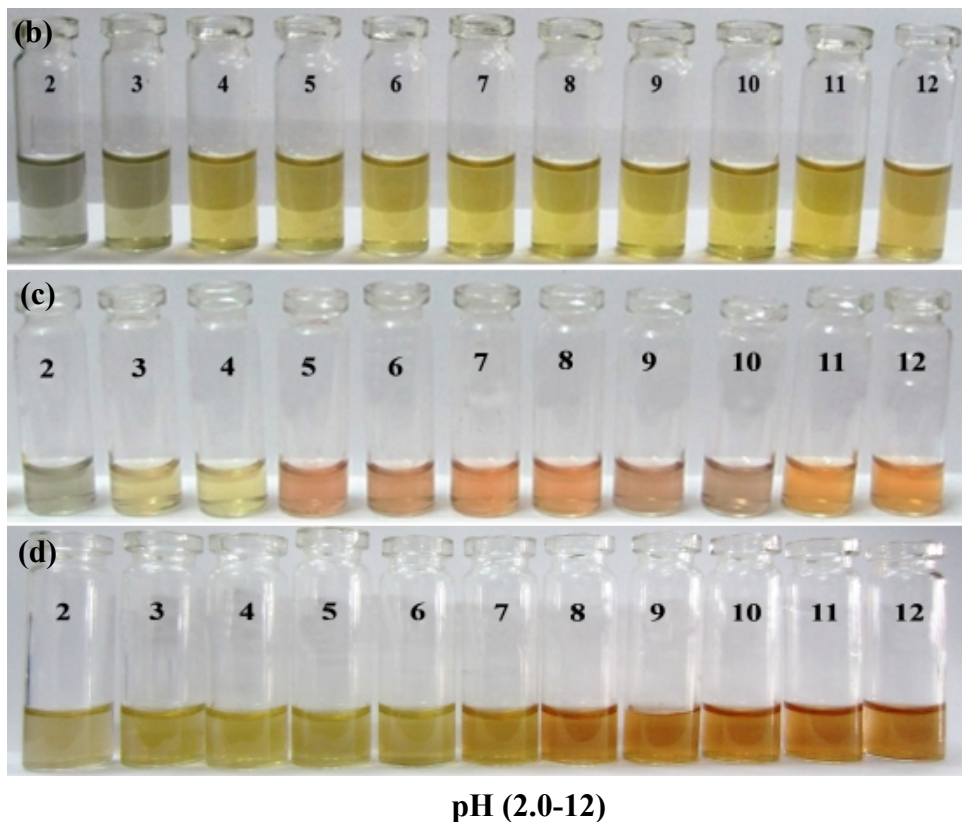

**Figure S5.** (a) The UV-visible absorption ratios ( $A_{580\text{ nm}}/A_{395\text{ nm}}$  and  $A_{535\text{ nm}}/A_{395\text{ nm}}$ ) of SAA-DTC-Ag NPs aggregation induced by  $\text{Mn}^{2+}$  and  $\text{Cd}^{2+}$  ions using PBS pH at 8.0. Photographic images of SAA-DTC-Ag NPs (b) without analyte, in presence of (c)  $\text{Mn}^{2+}$  ion and (d)  $\text{Cd}^{2+}$  ion at PBS 2.0-12.

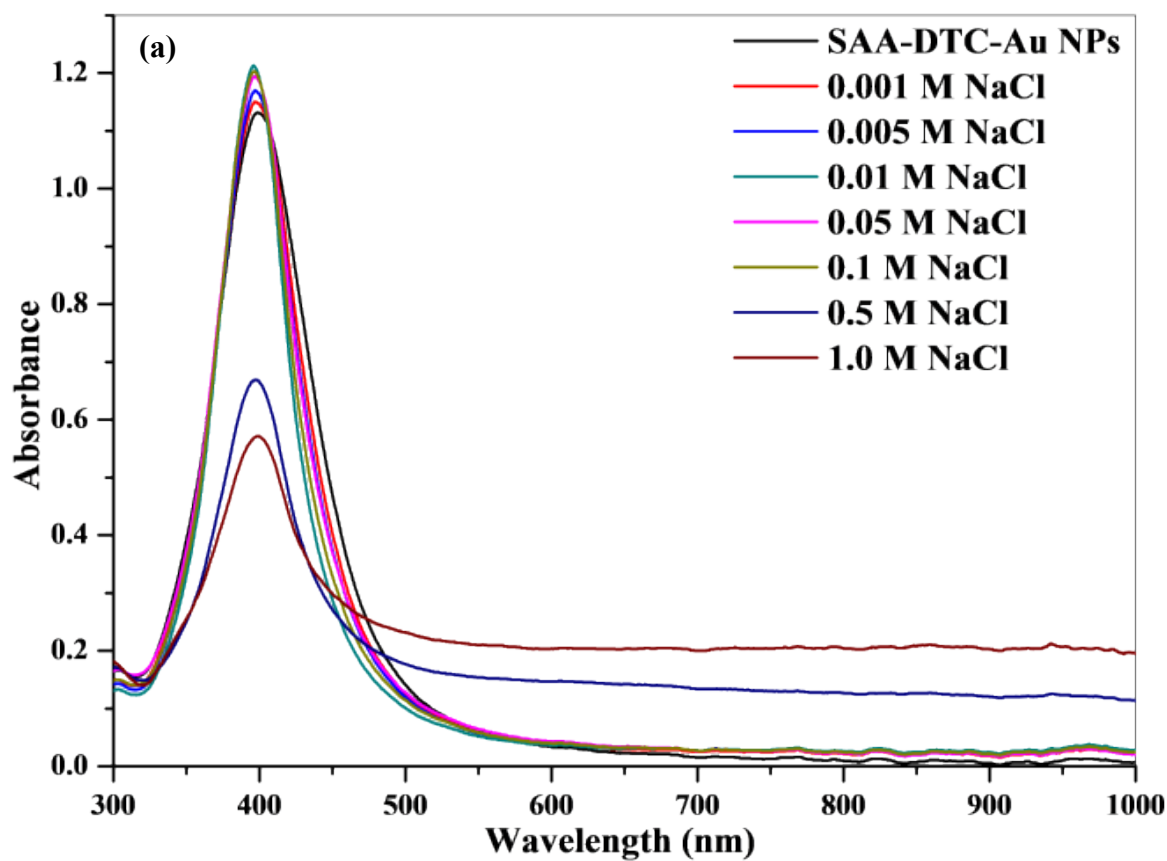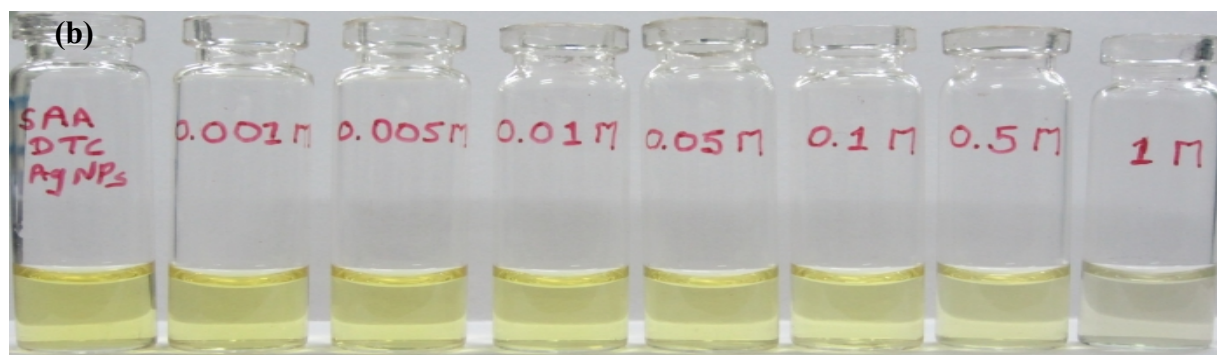

Concentration of NaCl (M)

**Figure S6.** UV-visible absorption spectra of SAA-DTC-Ag NPs dispersions with increasing concentrations of NaCl from 0.001 M to 1.0 M.

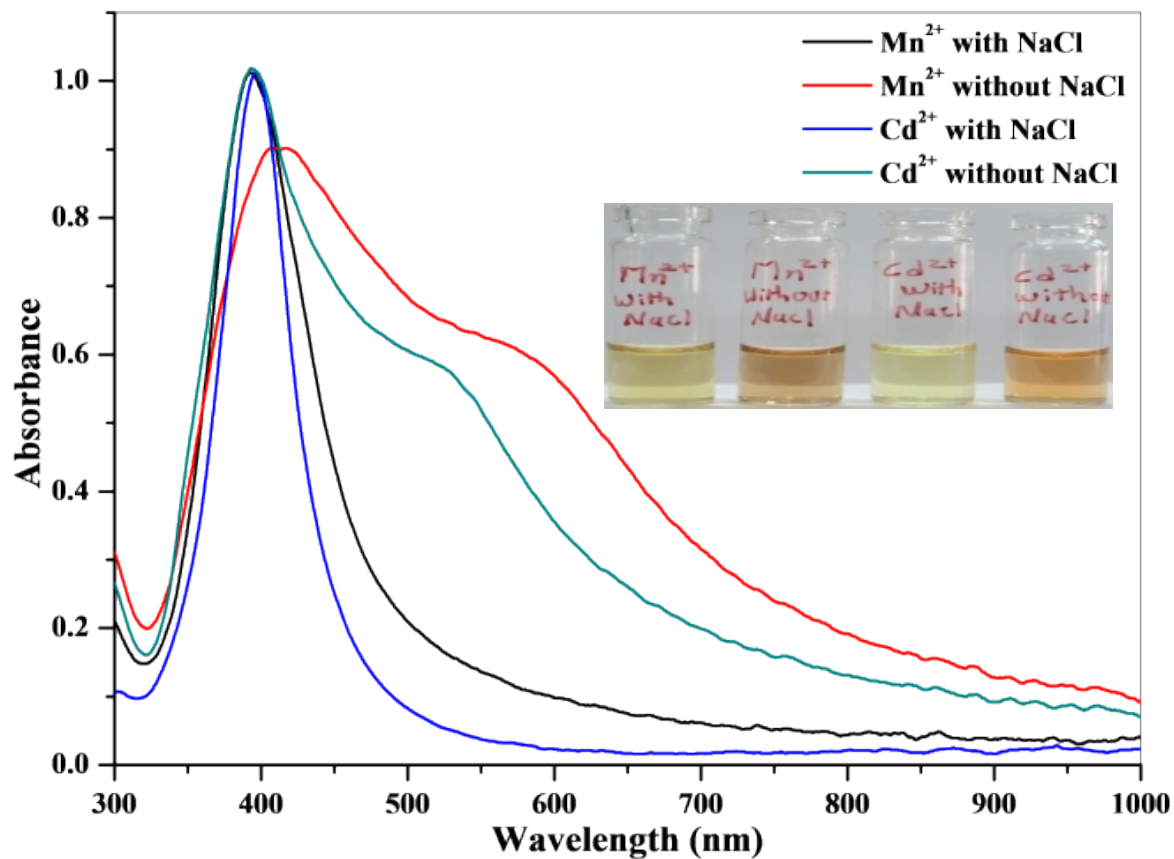

**Figure S7.** UV-visible absorption spectra of SAA-DTC-Ag NPs upon the addition of  $\text{Mn}^{2+}$  (1 mM) and  $\text{Cd}^{2+}$  (1 mM) at PBS pH 8 with and without NaCl (0.1 M).

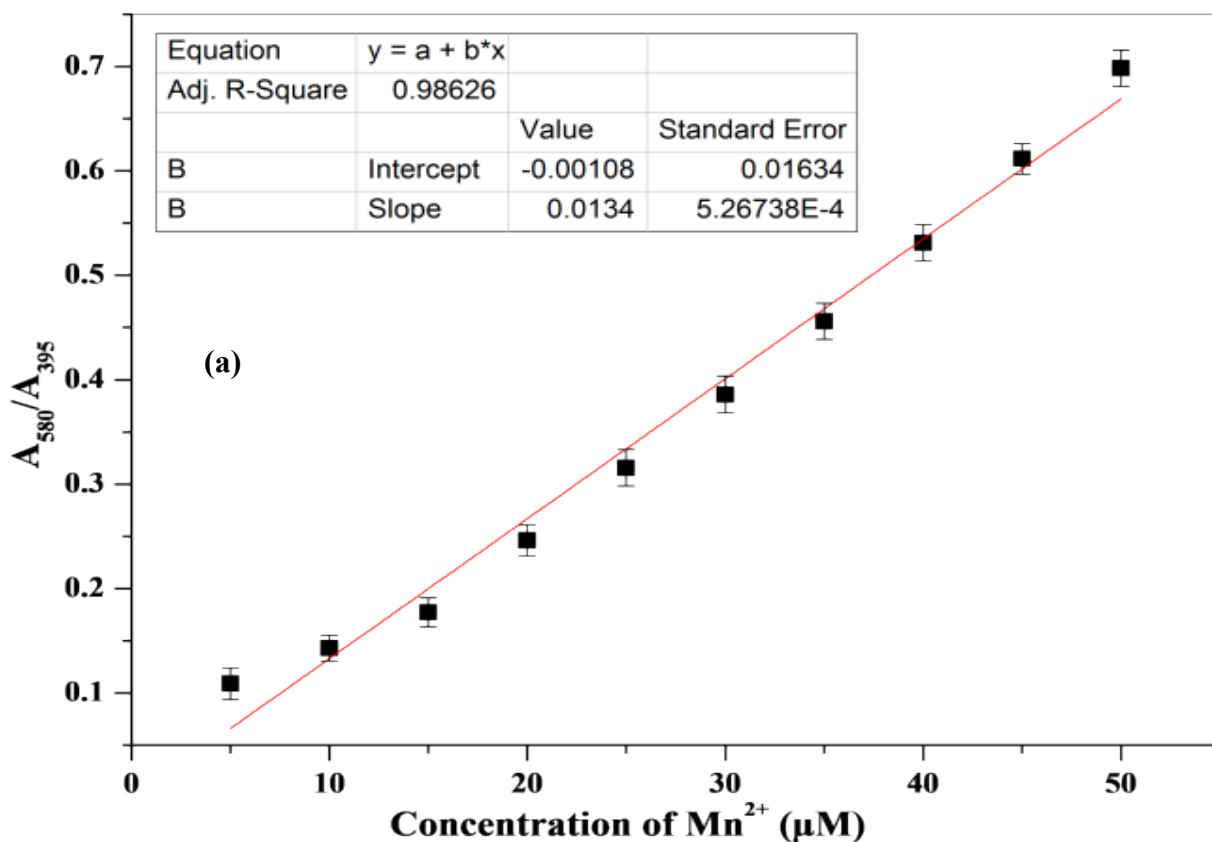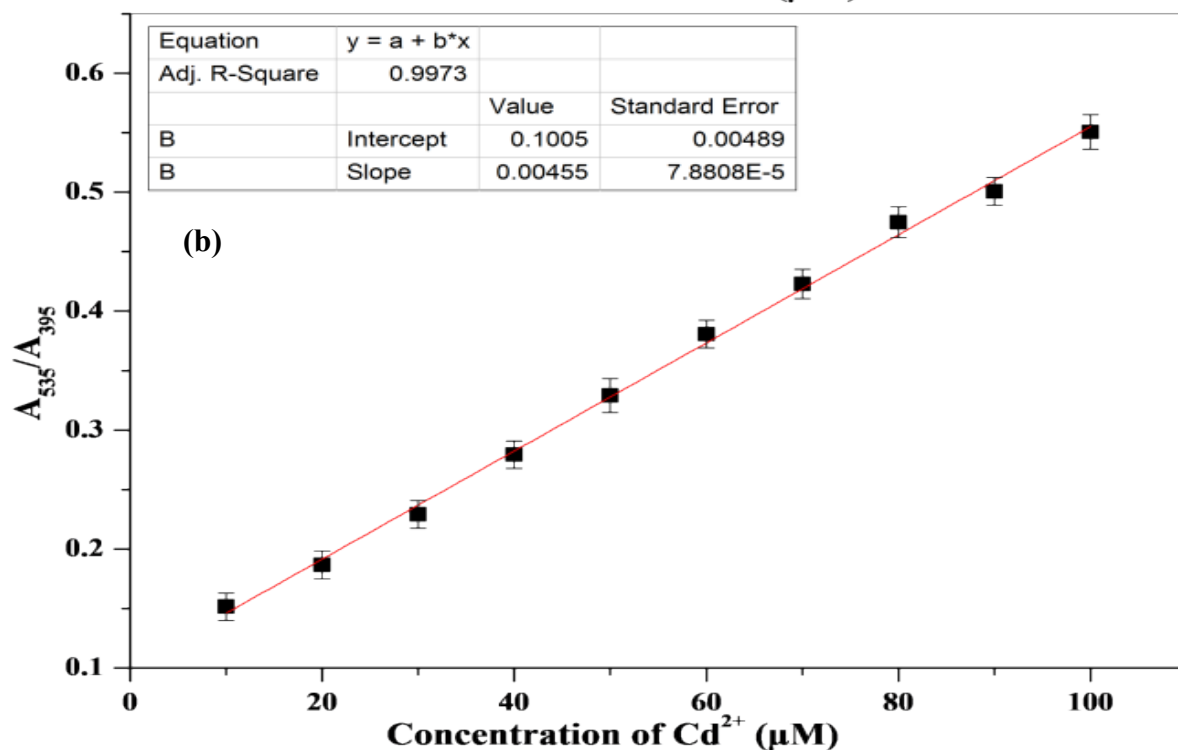

**Figure S8.** Calibration graphs plotted between the absorption ratios at (a)  $A_{580nm}/A_{395nm}$  and concentration of  $Mn^{2+}$  ion and (b) at  $A_{535nm}/A_{395nm}$  and concentration of  $Cd^{2+}$  ion using SAA-DTC-Ag NPs as a colorimetric probe. Error bars show standard deviations between three independent experiments
